# Supplementary material
Source: publisher figshare collection journal article supplement (https://geolsoc.figshare.com/ndownloader/files/28842985)
Supplement: Supplementary file 1 [file 28842985]

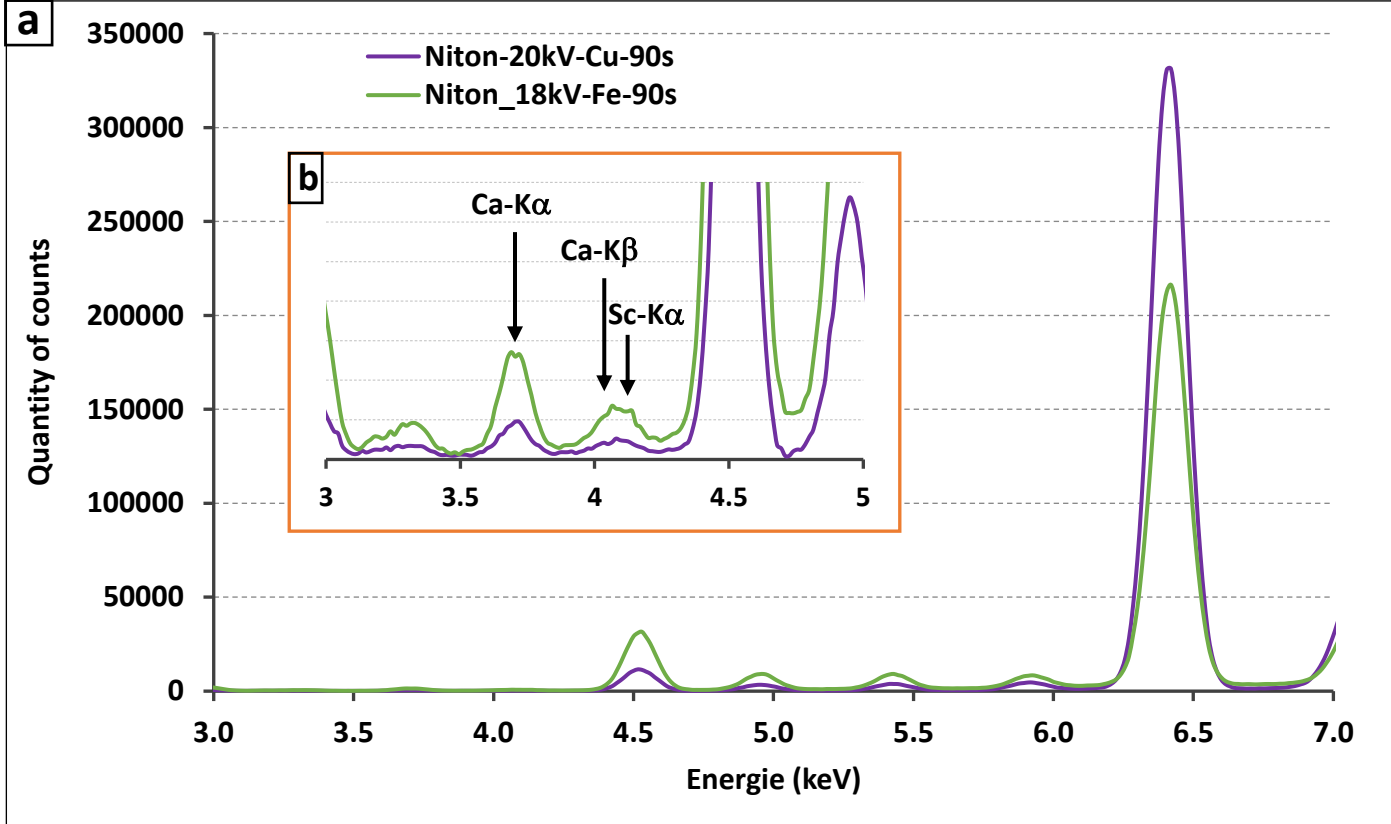

**Figure F: Signal improvement for the quantification of Sc and Ca for an example of XRF spectrum (log scale of counts per second as a function of energy in keV) fitted with PyMCA (Solé et al., 2007) of the same laterite sample (containing 0.2% of Ca and 251.7 ppm of Sc) acquired with the Niton pXRF spectrometer. The energy range is from 3 to 7 keV in the scandium spectral region for the pXRF analysis.**

*(a) Spectrum acquired using the '20 Cu' method (purple curve) and the '18 Fe' method (green curve) for the same analysis time (90 seconds) in an energy range from 3 to 7 keV; (b) Zoom on this spectrum in an energy range from 3 to 5 keV showing the spectral lines of Ca and Sc (Ca-K $\alpha$ , Ca-K $\beta$  and Sc-K $\alpha$ ).*
